# Supplementary material for: Coformulation of Broadly Neutralizing Antibodies 3BNC117 and PGT121: Analytical Challenges During Preformulation Characterization and Storage Stability Studies
Source: PubMed Central journal article supplement (PMC6269598; doi:10.1016/j.xphs.2018.08.012), 2018-12

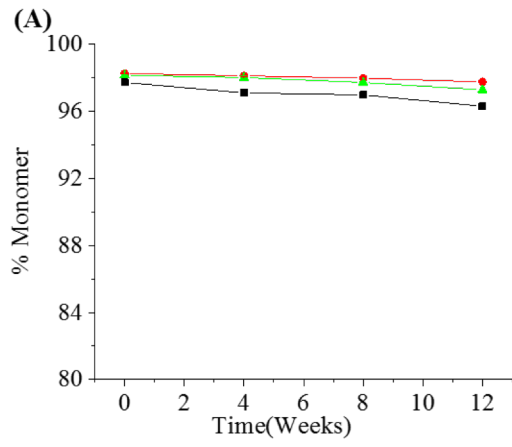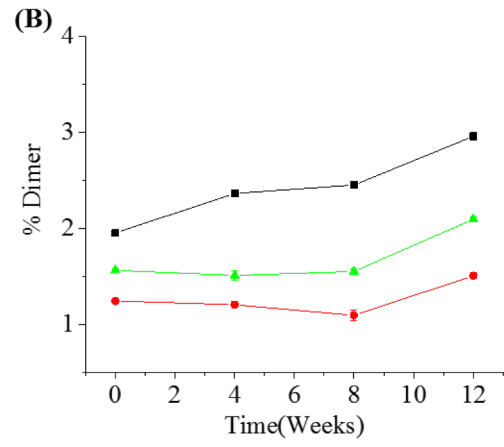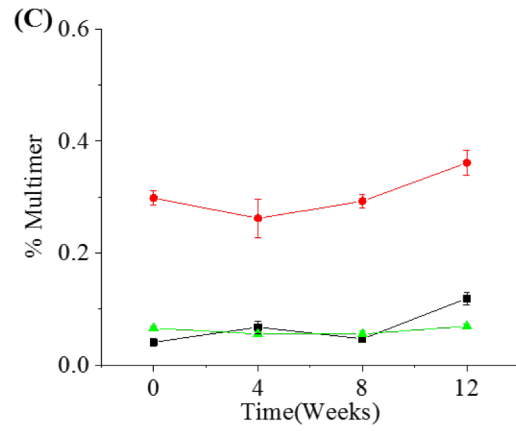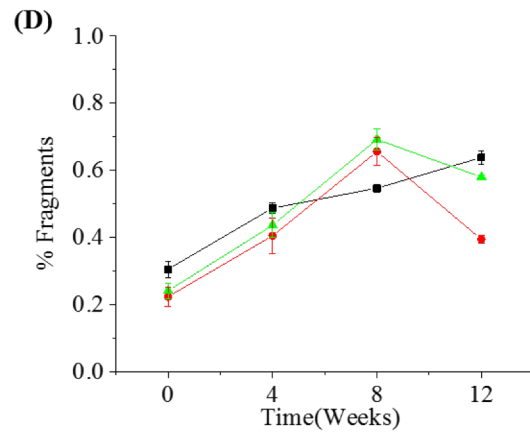

Supplement: mmc1.pdf [file mmc1.pdf]
