# Supplementary material for: Coformulation of Broadly Neutralizing Antibodies 3BNC117 and PGT121: Analytical Challenges During Preformulation Characterization and Storage Stability Studies
Source: PubMed Central journal article supplement (PMC6269598; doi:10.1016/j.xphs.2018.08.012), 2018-12

(A) % Purity

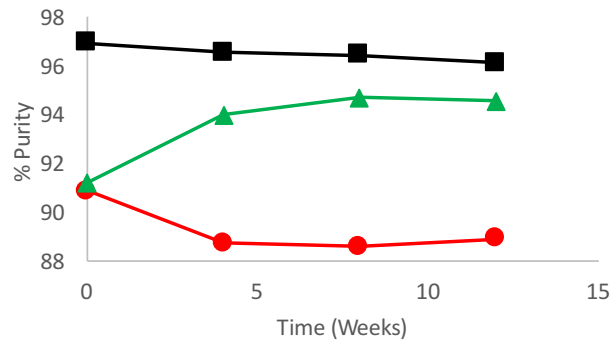

(B) % Pre Light Chain Peaks 10-35kDa

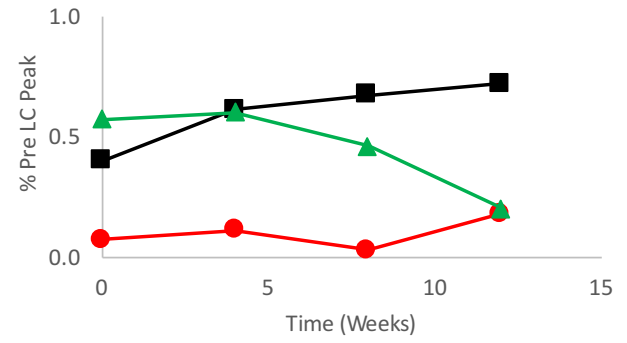

(C) % Mid MW Peaks 50-100kDa

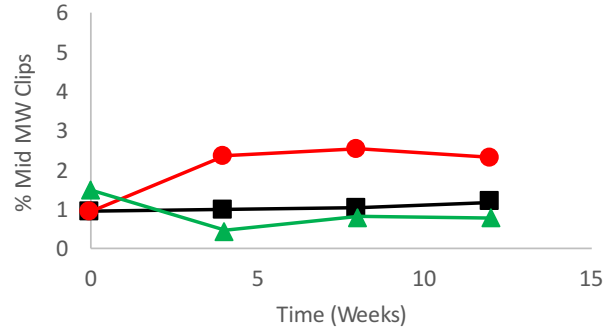

(D) % Total Clips

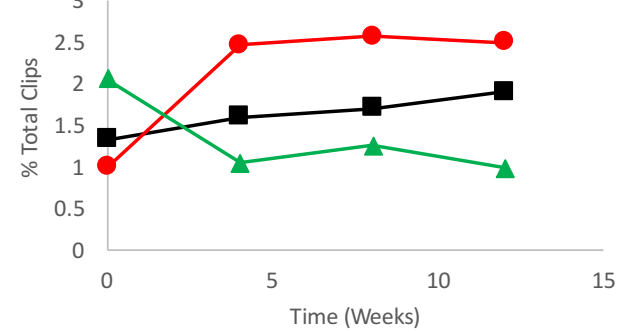

Supplement: mmc2.pdf [file mmc2.pdf]
