# Supplementary material for: Coformulation of Broadly Neutralizing Antibodies 3BNC117 and PGT121: Analytical Challenges During Preformulation Characterization and Storage Stability Studies
Source: PubMed Central journal article supplement (PMC6269598; doi:10.1016/j.xphs.2018.08.012), 2018-12
Supplement: mmc4.pdf [file mmc4.pdf]

|                |                                                                                                                                                                                                                                                                                                                                                                                                                                                                                                                                                                                                                                                                        |                          |         |                          |            |            |            |       |      |       |      |    |      |    |      |    |       |    |     |    |     |    |     |    |     |    |     |    |     |    |     |    |     |    |     |    |      |     |       |       |      |      |      |      |      |      |      |      |      |      |      |      |      |      |      |       |     |       |     |       |       |       |   |       |   |       |   |       |   |       |   |       |   |       |   |       |   |       |   |       |   |       |   |       |   |       |   |       |   |       |   |       |   |       |   |       |   |       |   |       |
|----------------|------------------------------------------------------------------------------------------------------------------------------------------------------------------------------------------------------------------------------------------------------------------------------------------------------------------------------------------------------------------------------------------------------------------------------------------------------------------------------------------------------------------------------------------------------------------------------------------------------------------------------------------------------------------------|--------------------------|---------|--------------------------|------------|------------|------------|-------|------|-------|------|----|------|----|------|----|-------|----|-----|----|-----|----|-----|----|-----|----|-----|----|-----|----|-----|----|-----|----|-----|----|------|-----|-------|-------|------|------|------|------|------|------|------|------|------|------|------|------|------|------|------|-------|-----|-------|-----|-------|-------|-------|---|-------|---|-------|---|-------|---|-------|---|-------|---|-------|---|-------|---|-------|---|-------|---|-------|---|-------|---|-------|---|-------|---|-------|---|-------|---|-------|---|-------|---|-------|---|-------|
| ASN #          | Ldr-19<br>Ldr-18<br>Ldr-17<br>Ldr-16<br>Ldr-15<br>Ldr-14<br>Ldr-13<br>Ldr-12<br>Ldr-11<br>Ldr-10<br>Ldr-9<br>Ldr-8<br>Ldr-7<br>Ldr-6<br>Ldr-5<br>Ldr-4<br>Ldr-3<br>Ldr-2<br>Ldr-1<br>KV1<br>KV2<br>KV3<br>KV4<br>KV5<br>KV6<br>KV7<br>KV8<br>KV9<br>KV10<br>KV11<br>KV12<br>KV13<br>KV14<br>KV15<br>KV16<br>KV17<br>KV18<br>KV19<br>KV20<br>KV21<br>KV22<br>KV23<br>KV24<br>KV25<br>KV26<br>KV27<br>KV28<br>KV29<br>KV30<br>KV31                                                                                                                                                                                                                                       | MiscLdr Sig              | KV FR1  | KV CDR1                  | ASN #      | 3BNC117_LC |            |       |      |       |      |    |      |    |      |    |       |    |     |    |     |    |     |    |     |    |     |    |     |    |     |    |     |    |     |    |      |     |       |       |      |      |      |      |      |      |      |      |      |      |      |      |      |      |      |       |     |       |     |       |       |       |   |       |   |       |   |       |   |       |   |       |   |       |   |       |   |       |   |       |   |       |   |       |   |       |   |       |   |       |   |       |   |       |   |       |   |       |   |       |
| MatureLinear # | M                                                                                                                                                                                                                                                                                                                                                                                                                                                                                                                                                                                                                                                                      | G                        | W       | S                        | C          | I          | L          | I     | L    | F     | L    | V  | L    | A  | T    | A  | T     | G  | V   | H  | S   | D  | I   | Q  | M   | T  | Q   | S  | P   | S  | L   | S  | A   | S  | V   | G  | D    | T   | V     | T     | I    | T    | C    | Q    | A    | -    | 25.1 | -    | 25.2 | -    | 25.3 | -    | 25.4 | -    | 25.5 | -     | N   |       |     |       |       |       |   |       |   |       |   |       |   |       |   |       |   |       |   |       |   |       |   |       |   |       |   |       |   |       |   |       |   |       |   |       |   |       |   |       |   |       |   |       |
| ASN #          | KV32<br>KV33<br>KV34<br>KV35<br>KV36<br>KV37<br>KV38<br>KV39<br>KV40<br>KV41<br>KV42<br>KV43<br>KV44<br>KV45<br>KV46<br>KV47<br>KV48<br>KV49<br>KV50<br>KV51<br>KV52<br>KV53<br>KV54<br>KV55<br>KV56<br>KV57<br>KV58<br>KV59<br>KV60<br>KV61<br>KV62<br>KV63<br>KV64<br>KV65<br>KV66<br>KV67<br>KV68<br>KV69<br>KV70<br>KV71<br>KV72<br>KV73<br>KV74<br>KV75<br>KV76<br>KV77<br>KV78<br>KV79<br>KV80<br>KV81                                                                                                                                                                                                                                                           | KV CDR1                  | KV FR2  | KV CDR2                  | KV FR3     | ASN #      | 3BNC117_LC |       |      |       |      |    |      |    |      |    |       |    |     |    |     |    |     |    |     |    |     |    |     |    |     |    |     |    |     |    |      |     |       |       |      |      |      |      |      |      |      |      |      |      |      |      |      |      |      |       |     |       |     |       |       |       |   |       |   |       |   |       |   |       |   |       |   |       |   |       |   |       |   |       |   |       |   |       |   |       |   |       |   |       |   |       |   |       |   |       |   |       |   |       |
| MatureLinear # | G                                                                                                                                                                                                                                                                                                                                                                                                                                                                                                                                                                                                                                                                      | -                        | 27.1    | -                        | 27.2       | -          | 27.3       | -     | 27.4 | -     | 27.5 | -  | 27.6 | -  | 27.7 | -  | Y     | L  | N   | W  | Y   | Q  | Q   | R  | R   | G  | K   | A  | P   | K  | L   | L  | I   | Y  | D   | -  | 46.1 | -   | 46.2  | -     | 46.3 | -    | 46.4 | -    | 46.5 | -    | 46.6 | -    | 46.7 | -    | 46.8 | -    | G    | S    | K    | L     | E   | R     | G   | V     | P     | S     | R | F     | S | R     | F | S     | G | R     |   |       |   |       |   |       |   |       |   |       |   |       |   |       |   |       |   |       |   |       |   |       |   |       |   |       |   |       |   |       |
| ASN #          | KV82<br>KV83<br>KV84<br>KV85<br>KV86<br>KV87<br>KV88<br>KV89<br>KV90<br>KV91<br>KV92<br>KV93<br>KV94<br>KV95<br>KV96<br>KV97<br>KV98<br>KV99<br>KV100<br>KV101<br>KV102<br>KV103<br>KV104<br>KV105<br>KV106<br>KV107<br>KV108<br>KV109<br>KV110<br>KV111<br>KV112<br>KV113<br>KV114<br>KV115<br>KV116<br>KV117<br>KV118<br>KV119<br>KV120<br>KV121<br>KV122<br>KV123<br>KV124<br>KV125<br>KV126<br>KV127<br>KV128<br>KV129<br>KV130<br>KV131                                                                                                                                                                                                                           | KV FR3                   | KV CDR3 | ASN #                    | 3BNC117_LC |            |            |       |      |       |      |    |      |    |      |    |       |    |     |    |     |    |     |    |     |    |     |    |     |    |     |    |     |    |     |    |      |     |       |       |      |      |      |      |      |      |      |      |      |      |      |      |      |      |      |       |     |       |     |       |       |       |   |       |   |       |   |       |   |       |   |       |   |       |   |       |   |       |   |       |   |       |   |       |   |       |   |       |   |       |   |       |   |       |   |       |   |       |   |       |
| MatureLinear # | R                                                                                                                                                                                                                                                                                                                                                                                                                                                                                                                                                                                                                                                                      | W                        | G       | -                        | 82         | -          | 83         | -     | 84   | -     | 84.1 | -  | 84.2 | -  | 85   | -  | Q     | E  | Y   | N  | L   | T  | I   | N  | N   | L  | Q   | P  | E   | D  | I   | A  | T   | Y  | F   | C  | Q    | V   | -     | 86.1  | -    | 86.2 | -    | 86.3 | -    | 86.4 | -    | 86.5 | -    | 86.6 | -    | 86.7 | -    | 86.8 | -    | 86.9  | -   | 86.10 | -   | 86.11 | -     | 86.12 | - | 86.13 | - | 86.14 | - | 86.15 | - | 86.16 | - | 86.17 | - | 86.18 | - | 86.19 | - | 86.20 | - | 86.21 | - | 86.22 | - | 86.23 | - | 86.24 | - | 86.25 | - | 86.26 | - | 86.27 | - | 86.28 | - | 86.29 | - | 86.30 | - | 86.31 |
| ASN #          | KV132<br>KV133<br>KV134<br>KV135<br>KV136<br>KV137<br>KV138<br>KV139<br>KV139.1<br>KV140<br>KV141<br>KV142<br>KV143<br>KV144<br>KV145<br>KV146<br>KV147<br>KV148<br>KV149<br>KV150<br>KV151<br>KV152<br>KV153<br>KV154<br>KV155<br>KV156<br>KV157<br>KV158<br>KV159<br>KV160<br>KV161<br>KV162<br>KV163<br>KV164<br>KV165<br>KV166<br>KV167<br>KV168<br>KV169<br>KV170<br>KV171<br>KV172<br>KV173<br>KV174<br>KV175<br>KV176<br>KV177<br>KV178<br>KV179<br>KV180<br>KV181                                                                                                                                                                                              | KV CDR3                  | KV FR4  | Kappa Constant Ig Domain | ASN #      | 3BNC117_LC |            |       |      |       |      |    |      |    |      |    |       |    |     |    |     |    |     |    |     |    |     |    |     |    |     |    |     |    |     |    |      |     |       |       |      |      |      |      |      |      |      |      |      |      |      |      |      |      |      |       |     |       |     |       |       |       |   |       |   |       |   |       |   |       |   |       |   |       |   |       |   |       |   |       |   |       |   |       |   |       |   |       |   |       |   |       |   |       |   |       |   |       |   |       |
| MatureLinear # | -                                                                                                                                                                                                                                                                                                                                                                                                                                                                                                                                                                                                                                                                      | 86.24                    | -       | 86.25                    | -          | 86.26      | -          | 86.27 | -    | 86.28 | -    | 87 | -    | 88 | -    | 89 | -     | 90 | -   | 91 | -   | 92 | -   | 93 | -   | 94 | -   | 95 | -   | 96 | -   | 97 | -   | 98 | -   | 99 | -    | 100 | -     | 100.1 | -    | 101  | -    | 102  | -    | 103  | -    | 104  | -    | 105  | -    | 106  | -    | 107  | -    | 108   | -   | 109   | -   | 110   | -     | 111   | - | 112   | - | 113   | - | 114   | - | 115   | - | 116   | - | 117   | - | 117.1 | - | 117.2 | - | 118   | - | 119   | - | 120   | - | 121   | - | 122   | - | 123   | - | 124   | - | 125   | - | 126   |   |       |   |       |
| ASN #          | KCnstlg32<br>KCnstlg33<br>KCnstlg34<br>KCnstlg35<br>KCnstlg36<br>KCnstlg37<br>KCnstlg38<br>KCnstlg39<br>KCnstlg40<br>KCnstlg41<br>KCnstlg42<br>KCnstlg43<br>KCnstlg44<br>KCnstlg45<br>KCnstlg46<br>KCnstlg47<br>KCnstlg48<br>KCnstlg49<br>KCnstlg50<br>KCnstlg51<br>KCnstlg52<br>KCnstlg53<br>KCnstlg54<br>KCnstlg55<br>KCnstlg56<br>KCnstlg57<br>KCnstlg58<br>KCnstlg59<br>KCnstlg60<br>KCnstlg61<br>KCnstlg62<br>KCnstlg63<br>KCnstlg64<br>KCnstlg65<br>KCnstlg66<br>KCnstlg67<br>KCnstlg68<br>KCnstlg69<br>KCnstlg70<br>KCnstlg71<br>KCnstlg72<br>KCnstlg73<br>KCnstlg74<br>KCnstlg75<br>KCnstlg76<br>KCnstlg77<br>KCnstlg78<br>KCnstlg79<br>KCnstlg80<br>KCnstlg81 | Kappa Constant Ig Domain | ASN #   | 3BNC117_LC               |            |            |            |       |      |       |      |    |      |    |      |    |       |    |     |    |     |    |     |    |     |    |     |    |     |    |     |    |     |    |     |    |      |     |       |       |      |      |      |      |      |      |      |      |      |      |      |      |      |      |      |       |     |       |     |       |       |       |   |       |   |       |   |       |   |       |   |       |   |       |   |       |   |       |   |       |   |       |   |       |   |       |   |       |   |       |   |       |   |       |   |       |   |       |   |       |
| MatureLinear # | L                                                                                                                                                                                                                                                                                                                                                                                                                                                                                                                                                                                                                                                                      | L                        | N       | N                        | F          | Y          | P          | -     | -    | R     | E    | A  | K    | V  | Q    | W  | -     | K  | V   | D  | N   | A  | L   | Q  | S   | G  | N   | S  | Q   | E  | S   | V  | T   | E  | Q   | D  | -    | 151 | -     | 152   | -    | 153  | -    | 154  | -    | 155  | -    | 156  | -    | 157  | -    | 158  | -    | 159  | -    | 159.1 | -   | 159.2 | -   | 159.3 | -     | 160   | - | 161   | - | 162   | - | 163   | - | 164   | - | 165   | - | 166   | - | 167   | - | 168   | - | 169   |   |       |   |       |   |       |   |       |   |       |   |       |   |       |   |       |   |       |   |       |
| ASN #          | KCnstlg82<br>KCnstlg83<br>KCnstlg84<br>KCnstlg85<br>KCnstlg86<br>KCnstlg87<br>KCnstlg88<br>KCnstlg89<br>KCnstlg90<br>KCnstlg91<br>KCnstlg92<br>KCnstlg93<br>KCnstlg94<br>KCnstlg95<br>KCnstlg96<br>KCnstlg97<br>KCnstlg98<br>KCnstlg99<br>KCnstlg100<br>KCnstlg101<br>KCnstlg102<br>KCnstlg103<br>KCnstlg104<br>KCnstlg105<br>KCnstlg106<br>KCnstlg107<br>KCnstlg108<br>KCnstlg109<br>KCnstlg110<br>KCnstlg111<br>KCnstlg112<br>KCnstlg113<br>KCnstlg114<br>KCnstlg115<br>KCnstlg116<br>KCnstlg117<br>KCnstlg118<br>KCnstlg119<br>KCnstlg120<br>KCnstlg121<br>KCnstlg122<br>KCnstlg123                                                                                 | Kappa Constant Ig Domain | ASN #   | 3BNC117_LC               |            |            |            |       |      |       |      |    |      |    |      |    |       |    |     |    |     |    |     |    |     |    |     |    |     |    |     |    |     |    |     |    |      |     |       |       |      |      |      |      |      |      |      |      |      |      |      |      |      |      |      |       |     |       |     |       |       |       |   |       |   |       |   |       |   |       |   |       |   |       |   |       |   |       |   |       |   |       |   |       |   |       |   |       |   |       |   |       |   |       |   |       |   |       |   |       |
| MatureLinear # | T                                                                                                                                                                                                                                                                                                                                                                                                                                                                                                                                                                                                                                                                      | L                        | T       | L                        | S          | K          | A          | D     | Y    | -     | E    | K  | H    | K  | V    | -  | 183.1 | -  | 184 | -  | 185 | -  | 187 | -  | 188 | -  | 189 | -  | 190 | -  | 191 | -  | 192 | -  | 193 | -  | 194  | -   | 194.1 | -     | 197  | -    | 198  | -    | 199  | -    | 200  | -    | 201  | -    | 202  | -    | 203  | -    | 204  | -     | 205 | -     | 206 | -     | 206.1 | -     |   |       |   |       |   |       |   |       |   |       |   |       |   |       |   |       |   |       |   |       |   |       |   |       |   |       |   |       |   |       |   |       |   |       |   |       |   |       |
