# Supplementary material for: Coformulation of Broadly Neutralizing Antibodies 3BNC117 and PGT121: Analytical Challenges During Preformulation Characterization and Storage Stability Studies
Source: PubMed Central journal article supplement (PMC6269598; doi:10.1016/j.xphs.2018.08.012), 2018-12
Supplement: mmc5.pdf [file mmc5.pdf]

Supp Fig 5

|                |                                                                                                                                                                                                                                                                                                                                                                                                                                                                                                                                                                                                                                                                                                                                                                                                                                                                                                                                                                                                                                                                                                                                                                                                                                                                                                                                                                                                                                                                                                                                                                                                                                                                                                                                                                                                                                                                                                       |                                                    |           |
|----------------|-------------------------------------------------------------------------------------------------------------------------------------------------------------------------------------------------------------------------------------------------------------------------------------------------------------------------------------------------------------------------------------------------------------------------------------------------------------------------------------------------------------------------------------------------------------------------------------------------------------------------------------------------------------------------------------------------------------------------------------------------------------------------------------------------------------------------------------------------------------------------------------------------------------------------------------------------------------------------------------------------------------------------------------------------------------------------------------------------------------------------------------------------------------------------------------------------------------------------------------------------------------------------------------------------------------------------------------------------------------------------------------------------------------------------------------------------------------------------------------------------------------------------------------------------------------------------------------------------------------------------------------------------------------------------------------------------------------------------------------------------------------------------------------------------------------------------------------------------------------------------------------------------------|----------------------------------------------------|-----------|
| ASN #          | Ldr-20<br>Ldr-19<br>Ldr-18<br>Ldr-17<br>Ldr-16<br>Ldr-15<br>Ldr-14<br>Ldr-13<br>Ldr-12<br>Ldr-11<br>Ldr-10<br>Ldr-9<br>Ldr-8<br>Ldr-7<br>Ldr-6<br>Ldr-5<br>Ldr-4<br>Ldr-3<br>Ldr-2<br>Ldr-1<br>LmdV1<br>LmdV2<br>LmdV3<br>LmdV4<br>LmdV5<br>LmdV6<br>LmdV7<br>LmdV8<br>LmdV9<br>LmdV10<br>LmdV11<br>LmdV12<br>LmdV13<br>LmdV14<br>LmdV15<br>LmdV16<br>LmdV17<br>LmdV18<br>LmdV19<br>LmdV20<br>LmdV21<br>LmdV22<br>LmdV23<br>LmdV24<br>LmdV25<br>LmdV26<br>LmdV27<br>LmdV28<br>LmdV29<br>LmdV30                                                                                                                                                                                                                                                                                                                                                                                                                                                                                                                                                                                                                                                                                                                                                                                                                                                                                                                                                                                                                                                                                                                                                                                                                                                                                                                                                                                                        | MiscLdr Sig<br>LmdV FR1<br>LmdV CDR1               | ASN #     |
| MatureLinear # |                                                                                                                                                                                                                                                                                                                                                                                                                                                                                                                                                                                                                                                                                                                                                                                                                                                                                                                                                                                                                                                                                                                                                                                                                                                                                                                                                                                                                                                                                                                                                                                                                                                                                                                                                                                                                                                                                                       |                                                    |           |
| PGT121_LC      | M Y R M Q L L S C I A L S L A L V T N S                                                                                                                                                                                                                                                                                                                                                                                                                                                                                                                                                                                                                                                                                                                                                                                                                                                                                                                                                                                                                                                                                                                                                                                                                                                                                                                                                                                                                                                                                                                                                                                                                                                                                                                                                                                                                                                               |                                                    | PGT121_LC |
| ASN #          | LmdV31<br>LmdV32<br>LmdV33<br>LmdV34<br>LmdV35<br>LmdV36<br>LmdV37<br>LmdV38<br>LmdV39<br>LmdV40<br>LmdV41<br>LmdV42<br>LmdV43<br>LmdV44<br>LmdV45<br>LmdV46<br>LmdV47<br>LmdV48<br>LmdV49<br>LmdV50<br>LmdV51<br>LmdV52<br>LmdV53<br>LmdV54<br>LmdV55<br>LmdV56<br>LmdV57<br>LmdV58<br>LmdV59<br>LmdV60<br>LmdV61<br>LmdV62<br>LmdV63<br>LmdV64<br>LmdV65<br>LmdV66<br>LmdV67<br>LmdV68<br>LmdV69<br>LmdV70<br>LmdV71<br>LmdV72<br>LmdV73<br>LmdV74<br>LmdV75<br>LmdV76<br>LmdV77<br>LmdV78<br>LmdV79<br>LmdV80                                                                                                                                                                                                                                                                                                                                                                                                                                                                                                                                                                                                                                                                                                                                                                                                                                                                                                                                                                                                                                                                                                                                                                                                                                                                                                                                                                                      | LmdV CDR1<br>LmdV FR2<br>LmdV CDR2<br>LmdV FR3     | ASN #     |
| MatureLinear # |                                                                                                                                                                                                                                                                                                                                                                                                                                                                                                                                                                                                                                                                                                                                                                                                                                                                                                                                                                                                                                                                                                                                                                                                                                                                                                                                                                                                                                                                                                                                                                                                                                                                                                                                                                                                                                                                                                       |                                                    |           |
| PGT121_LC      | L G S - 22.1 - 22.2 - 22.3 - 22.4 - 22.5 R A V Q W Y Z A P S L I I Y N - 42.1 - 42.2 - 42.3 - 42.4 - 42.5 - 42.6 - 42.7 - 42.8 - 42.9 - 43 - 44 - 45 - 46 - 47 - 48 - 49 - 50 - 51 - 52 - 53 - 54 - 55 - 56                                                                                                                                                                                                                                                                                                                                                                                                                                                                                                                                                                                                                                                                                                                                                                                                                                                                                                                                                                                                                                                                                                                                                                                                                                                                                                                                                                                                                                                                                                                                                                                                                                                                                           |                                                    | PGT121_LC |
| ASN #          | LmdV80.1<br>LmdV80.2<br>LmdV80.3<br>LmdV81<br>LmdV82<br>LmdV83<br>LmdV84<br>LmdV85<br>LmdV86<br>LmdV87<br>LmdV88<br>LmdV89<br>LmdV90<br>LmdV91<br>LmdV92<br>LmdV93<br>LmdV94<br>LmdV95<br>LmdV96<br>LmdV97<br>LmdV98<br>LmdV99<br>LmdV100<br>LmdV101<br>LmdV102<br>LmdV103<br>LmdV104<br>LmdV105<br>LmdV106<br>LmdV107<br>LmdV108<br>LmdV109<br>LmdV110<br>LmdV111<br>LmdV112<br>LmdV113<br>LmdV114<br>LmdV115<br>LmdV116<br>LmdV117<br>LmdV118<br>LmdV119<br>LmdV120<br>LmdV121<br>LmdV122<br>LmdV123<br>LmdV124<br>LmdV125<br>LmdV126<br>LmdV127                                                                                                                                                                                                                                                                                                                                                                                                                                                                                                                                                                                                                                                                                                                                                                                                                                                                                                                                                                                                                                                                                                                                                                                                                                                                                                                                                    | LmdV FR3<br>LmdV CDR3                              | ASN #     |
| MatureLinear # |                                                                                                                                                                                                                                                                                                                                                                                                                                                                                                                                                                                                                                                                                                                                                                                                                                                                                                                                                                                                                                                                                                                                                                                                                                                                                                                                                                                                                                                                                                                                                                                                                                                                                                                                                                                                                                                                                                       |                                                    |           |
| PGT121_LC      | S P D S P F G - 63.1 - 63.2 T T A T L T I T S V E A G D E A D Y Y C H I W D S R - 89.1 - 89.2 - 89.3 - 89.4 - 89.5 - 89.6 - 89.7 - 89.8 - 89.9 - 90 - 91 - 92 - 93 - 94 - 95 - 96 - 97 - 98 - 99 - 100 - 101 - 102 - 103 - 104 - 105 - 106 - 107 - 108 - 109 - 110 - 111 - 112 - 113 - 114 - 115 - 116 - 117 - 118 - 119 - 120 - 121 - 122 - 123 - 124 - 125 - 126 - 127 - 128 - 129 - 130                                                                                                                                                                                                                                                                                                                                                                                                                                                                                                                                                                                                                                                                                                                                                                                                                                                                                                                                                                                                                                                                                                                                                                                                                                                                                                                                                                                                                                                                                                            |                                                    | PGT121_LC |
| ASN #          | LmdV128<br>LmdV129<br>LmdV130<br>LmdV131<br>LmdV132<br>LmdV133<br>LmdV134<br>LmdV135<br>LmdV136<br>LmdV137<br>LmdV138<br>LmdV139<br>LmdV140<br>LmdV141<br>LmdV142<br>LmdV143<br>LmdV144<br>LmdV145<br>LmdV146<br>LmdV147<br>LmdV148<br>LmdV149<br>LmdV150<br>LmdV151<br>LmdV152<br>LmdV153<br>LmdV154<br>LmdV155<br>LmdV156<br>LmdV157<br>LmdV158<br>LmdV159<br>LmdV160<br>LmdV161<br>LmdV162<br>LmdV163<br>LmdV164<br>LmdV165<br>LmdV166<br>LmdV167<br>LmdV168<br>LmdV169<br>LmdV170<br>LmdV171<br>LmdV172<br>LmdV173<br>LmdV174<br>LmdV175<br>LmdV176<br>LmdV177<br>LmdV178<br>LmdV179<br>LmdV180                                                                                                                                                                                                                                                                                                                                                                                                                                                                                                                                                                                                                                                                                                                                                                                                                                                                                                                                                                                                                                                                                                                                                                                                                                                                                                   | LmdV CDR3<br>LmdV FR4<br>Lambda Constant Ig Domain | ASN #     |
| MatureLinear # |                                                                                                                                                                                                                                                                                                                                                                                                                                                                                                                                                                                                                                                                                                                                                                                                                                                                                                                                                                                                                                                                                                                                                                                                                                                                                                                                                                                                                                                                                                                                                                                                                                                                                                                                                                                                                                                                                                       |                                                    |           |
| PGT121_LC      | - 88.16 - 88.17 - 88.18 - 88.19 - 88.20 - V P T K W V F G G G T T L T V L G Q P K A A P S V T L F P P S S E - 122.1 - 122.2 - 123 - 124 - 124.1 - 124.2 - 125 - 126 - 127 - 128 - 129 - 130                                                                                                                                                                                                                                                                                                                                                                                                                                                                                                                                                                                                                                                                                                                                                                                                                                                                                                                                                                                                                                                                                                                                                                                                                                                                                                                                                                                                                                                                                                                                                                                                                                                                                                           |                                                    | PGT121_LC |
| ASN #          | LmdCnst-Ig-29<br>LmdCnst-Ig-30<br>LmdCnst-Ig-31<br>LmdCnst-Ig-32<br>LmdCnst-Ig-33<br>LmdCnst-Ig-34<br>LmdCnst-Ig-35<br>LmdCnst-Ig-36<br>LmdCnst-Ig-37<br>LmdCnst-Ig-38<br>LmdCnst-Ig-39<br>LmdCnst-Ig-40<br>LmdCnst-Ig-41<br>LmdCnst-Ig-42<br>LmdCnst-Ig-43<br>LmdCnst-Ig-44<br>LmdCnst-Ig-45<br>LmdCnst-Ig-46<br>LmdCnst-Ig-47<br>LmdCnst-Ig-48<br>LmdCnst-Ig-49<br>LmdCnst-Ig-50<br>LmdCnst-Ig-51<br>LmdCnst-Ig-52<br>LmdCnst-Ig-53<br>LmdCnst-Ig-54<br>LmdCnst-Ig-55<br>LmdCnst-Ig-56<br>LmdCnst-Ig-57<br>LmdCnst-Ig-58<br>LmdCnst-Ig-59<br>LmdCnst-Ig-60<br>LmdCnst-Ig-61<br>LmdCnst-Ig-62<br>LmdCnst-Ig-63<br>LmdCnst-Ig-64<br>LmdCnst-Ig-65<br>LmdCnst-Ig-66<br>LmdCnst-Ig-67<br>LmdCnst-Ig-68<br>LmdCnst-Ig-69<br>LmdCnst-Ig-70<br>LmdCnst-Ig-71<br>LmdCnst-Ig-72<br>LmdCnst-Ig-73<br>LmdCnst-Ig-74<br>LmdCnst-Ig-75<br>LmdCnst-Ig-76<br>LmdCnst-Ig-77<br>LmdCnst-Ig-78                                                                                                                                                                                                                                                                                                                                                                                                                                                                                                                                                                                                                                                                                                                                                                                                                                                                                                                                                                                                                        | Lambda Constant Ig Domain                          | ASN #     |
| MatureLinear # |                                                                                                                                                                                                                                                                                                                                                                                                                                                                                                                                                                                                                                                                                                                                                                                                                                                                                                                                                                                                                                                                                                                                                                                                                                                                                                                                                                                                                                                                                                                                                                                                                                                                                                                                                                                                                                                                                                       |                                                    |           |
| PGT121_LC      | L V C L I S D F Y P - 140.1 - 140.2 G A V T V A W - K A D S S P V K A G V E T T P S K Q - 166.1 - 166.2 - 166.3 - 166.4 - 166.5 - 167 - 168 - 169 - 170 - 171 - 172                                                                                                                                                                                                                                                                                                                                                                                                                                                                                                                                                                                                                                                                                                                                                                                                                                                                                                                                                                                                                                                                                                                                                                                                                                                                                                                                                                                                                                                                                                                                                                                                                                                                                                                                   |                                                    | PGT121_LC |
| ASN #          | LmdCnst-Ig-79<br>LmdCnst-Ig-80<br>LmdCnst-Ig-81<br>LmdCnst-Ig-82<br>LmdCnst-Ig-83<br>LmdCnst-Ig-84<br>LmdCnst-Ig-85<br>LmdCnst-Ig-86<br>LmdCnst-Ig-87<br>LmdCnst-Ig-88<br>LmdCnst-Ig-89<br>LmdCnst-Ig-90<br>LmdCnst-Ig-91<br>LmdCnst-Ig-92<br>LmdCnst-Ig-93<br>LmdCnst-Ig-94<br>LmdCnst-Ig-95<br>LmdCnst-Ig-96<br>LmdCnst-Ig-97<br>LmdCnst-Ig-98<br>LmdCnst-Ig-99<br>LmdCnst-Ig-100<br>LmdCnst-Ig-101<br>LmdCnst-Ig-102<br>LmdCnst-Ig-103<br>LmdCnst-Ig-104<br>LmdCnst-Ig-105<br>LmdCnst-Ig-106<br>LmdCnst-Ig-107<br>LmdCnst-Ig-108<br>LmdCnst-Ig-109<br>LmdCnst-Ig-110<br>LmdCnst-Ig-111<br>LmdCnst-Ig-112<br>LmdCnst-Ig-113<br>LmdCnst-Ig-114<br>LmdCnst-Ig-115<br>LmdCnst-Ig-116<br>LmdCnst-Ig-117<br>LmdCnst-Ig-118<br>LmdCnst-Ig-119<br>LmdCnst-Ig-120<br>LmdCnst-Ig-121<br>LmdCnst-Ig-122<br>LmdCnst-Ig-123                                                                                                                                                                                                                                                                                                                                                                                                                                                                                                                                                                                                                                                                                                                                                                                                                                                                                                                                                                                                                                                                                     | Lambda Constant Ig Domain                          | ASN #     |
| MatureLinear # |                                                                                                                                                                                                                                                                                                                                                                                                                                                                                                                                                                                                                                                                                                                                                                                                                                                                                                                                                                                                                                                                                                                                                                                                                                                                                                                                                                                                                                                                                                                                                                                                                                                                                                                                                                                                                                                                                                       |                                                    |           |
| PGT121_LC      | A S S Y L S L T P E Q W - K S H R S - 188.1 - 188.2 - 188.3 - 188.4 - 188.5 - 188.6 - 188.7 - 188.8 - 188.9 - 189 - 189.1 - 189.2 - 189.3 - 189.4 - 189.5 - 189.6 - 189.7 - 189.8 - 189.9 - 190 - 190.1 - 190.2 - 190.3 - 190.4 - 190.5 - 190.6 - 190.7 - 190.8 - 190.9 - 191 - 191.1 - 191.2 - 191.3 - 191.4 - 191.5 - 191.6 - 191.7 - 191.8 - 191.9 - 192 - 192.1 - 192.2 - 192.3 - 192.4 - 192.5 - 192.6 - 192.7 - 192.8 - 192.9 - 193 - 193.1 - 193.2 - 193.3 - 193.4 - 193.5 - 193.6 - 193.7 - 193.8 - 193.9 - 194 - 194.1 - 194.2 - 194.3 - 194.4 - 194.5 - 194.6 - 194.7 - 194.8 - 194.9 - 195 - 195.1 - 195.2 - 195.3 - 195.4 - 195.5 - 195.6 - 195.7 - 195.8 - 195.9 - 196 - 196.1 - 196.2 - 196.3 - 196.4 - 196.5 - 196.6 - 196.7 - 196.8 - 196.9 - 197 - 197.1 - 197.2 - 197.3 - 197.4 - 197.5 - 197.6 - 197.7 - 197.8 - 197.9 - 198 - 198.1 - 198.2 - 198.3 - 198.4 - 198.5 - 198.6 - 198.7 - 198.8 - 198.9 - 199 - 199.1 - 199.2 - 199.3 - 199.4 - 199.5 - 199.6 - 199.7 - 199.8 - 199.9 - 200 - 200.1 - 200.2 - 200.3 - 200.4 - 200.5 - 200.6 - 200.7 - 200.8 - 200.9 - 201 - 201.1 - 201.2 - 201.3 - 201.4 - 201.5 - 201.6 - 201.7 - 201.8 - 201.9 - 202 - 202.1 - 202.2 - 202.3 - 202.4 - 202.5 - 202.6 - 202.7 - 202.8 - 202.9 - 203 - 203.1 - 203.2 - 203.3 - 203.4 - 203.5 - 203.6 - 203.7 - 203.8 - 203.9 - 204 - 204.1 - 204.2 - 204.3 - 204.4 - 204.5 - 204.6 - 204.7 - 204.8 - 204.9 - 205 - 205.1 - 205.2 - 205.3 - 205.4 - 205.5 - 205.6 - 205.7 - 205.8 - 205.9 - 206 - 206.1 - 206.2 - 206.3 - 206.4 - 206.5 - 206.6 - 206.7 - 206.8 - 206.9 - 207 - 207.1 - 207.2 - 207.3 - 207.4 - 207.5 - 207.6 - 207.7 - 207.8 - 207.9 - 208 - 208.1 - 208.2 - 208.3 - 208.4 - 208.5 - 208.6 - 208.7 - 208.8 - 208.9 - 209 - 209.1 - 209.2 - 209.3 - 209.4 - 209.5 - 209.6 - 209.7 - 209.8 - 209.9 - 210 - 210.1 - 210.2 - 210.3 - 210.4 - 210.5 - 210.6 - 210.7 - 210.8 - 210.9 - 211 |                                                    | PGT121_LC |
