# Supplementary material for: Coformulation of Broadly Neutralizing Antibodies 3BNC117 and PGT121: Analytical Challenges During Preformulation Characterization and Storage Stability Studies
Source: PubMed Central journal article supplement (PMC6269598; doi:10.1016/j.xphs.2018.08.012), 2018-12
Supplement: mmc6.pdf [file mmc6.pdf]

|       |                                                                                                                                                                                                                                                                                            |       |
|-------|--------------------------------------------------------------------------------------------------------------------------------------------------------------------------------------------------------------------------------------------------------------------------------------------|-------|
| ASN # | Hinge55<br>Hinge56<br>Hinge57<br>Hinge58<br>Hinge59<br>Hinge60<br>Hinge61<br>Hinge62<br>Hinge63<br>Hinge64<br>Hinge65<br>Hinge66<br>Hinge67<br>Hinge68<br>Hinge69<br>Hinge70<br>Hinge71<br>Hinge72<br>Hinge73<br>Hinge74<br>Hinge75<br>Hinge76<br>Hinge77<br>Hinge78<br>Hinge79<br>Hinge80 | ASN # |
|-------|--------------------------------------------------------------------------------------------------------------------------------------------------------------------------------------------------------------------------------------------------------------------------------------------|-------|

|                |                                                                                                                                                                                                                                                                                                                                                                                                                                                                                                                                                                                                                                                                                                                                                                                                                                                                                                                                                                                                                                                                                                                                                                                                                                                                                                                                                                                                                               |                |                         |
|----------------|-------------------------------------------------------------------------------------------------------------------------------------------------------------------------------------------------------------------------------------------------------------------------------------------------------------------------------------------------------------------------------------------------------------------------------------------------------------------------------------------------------------------------------------------------------------------------------------------------------------------------------------------------------------------------------------------------------------------------------------------------------------------------------------------------------------------------------------------------------------------------------------------------------------------------------------------------------------------------------------------------------------------------------------------------------------------------------------------------------------------------------------------------------------------------------------------------------------------------------------------------------------------------------------------------------------------------------------------------------------------------------------------------------------------------------|----------------|-------------------------|
| MatureLinear # | 230.59 • 221.59<br>230.60 • 221.60<br>230.61 • 221.61<br>230.62 • 221.62<br>230.63 • 221.63<br>230.64 • 221.64<br>230.65 • 221.65<br>230.66 • 221.66<br>230.67 • 221.67<br>230.68 • 221.68<br>230.69 • 221.69<br>230.70 • 221.70<br>230.71 • 221.71<br>230.72 • 221.72<br>230.73 • 221.73<br>230.74 • 221.74<br>230.75 • 221.75<br>230.76 • 221.76<br>230.77 • 221.77<br>230.78 • 221.78<br>230.79 • 221.79<br>230.80 • 221.80<br>230.81 • 221.81<br>230.82 • 221.82<br>230.83 • 221.83<br>230.84 • 221.84<br>230.85 • 221.85<br>230.86 • 221.86<br>230.87 • 221.87<br>230.88 • 221.88<br>230.89 • 221.89<br>230.90 • 221.90<br>230.91 • 221.91<br>230.92 • 221.92<br>230.93 • 221.93<br>230.94 • 221.94<br>230.95 • 221.95<br>230.96 • 221.96<br>230.97 • 221.97<br>230.98 • 221.98<br>230.99 • 221.99<br>231 • 222<br>232 • 223<br>233 • 224<br>234 • 225<br>235 • 226<br>236 • 227<br>237 • 228<br>238 • 229<br>239 • 230<br>240 • 231<br>241 • 232<br>242 • 233<br>243 • 234<br>244 • 235<br>245 • 236<br>246 • 237<br>247 • 238<br>248 • 239<br>249 • 240<br>250 • 241<br>251 • 242<br>252 • 243<br>253 • 244<br>254 • 245<br>255 • 246<br>256 • 247<br>257 • 248<br>258 • 249<br>259 • 250<br>260 • 251<br>261 • 252<br>262 • 253<br>263 • 254<br>264 • 255<br>265 • 256<br>266 • 257<br>267 • 258<br>268 • 259<br>269 • 260<br>270 • 261<br>271 • 262<br>272 • 263<br>273 • 264<br>274 • 265<br>275 • 266<br>276 • 267 | MatureLinear # | 3BNC117_HC<br>PGT121_HC |
|----------------|-------------------------------------------------------------------------------------------------------------------------------------------------------------------------------------------------------------------------------------------------------------------------------------------------------------------------------------------------------------------------------------------------------------------------------------------------------------------------------------------------------------------------------------------------------------------------------------------------------------------------------------------------------------------------------------------------------------------------------------------------------------------------------------------------------------------------------------------------------------------------------------------------------------------------------------------------------------------------------------------------------------------------------------------------------------------------------------------------------------------------------------------------------------------------------------------------------------------------------------------------------------------------------------------------------------------------------------------------------------------------------------------------------------------------------|----------------|-------------------------|

|       |                                                                                                                                                                                                                                                                                                                                  |       |
|-------|----------------------------------------------------------------------------------------------------------------------------------------------------------------------------------------------------------------------------------------------------------------------------------------------------------------------------------|-------|
| ASN # | Hinge105<br>Hinge106<br>Hinge107<br>Hinge108<br>Hinge109<br>Hinge110<br>Hinge111<br>Hinge112<br>Hinge113<br>Hinge114<br>Hinge115<br>Hinge116<br>Hinge117<br>Hinge118<br>Hinge119<br>Hinge120<br>Hinge121<br>Hinge122<br>Hinge123<br>Hinge124<br>Hinge125<br>Hinge126<br>Hinge127<br>Hinge128<br>Hinge129<br>Hinge130<br>Hinge131 | ASN # |
|-------|----------------------------------------------------------------------------------------------------------------------------------------------------------------------------------------------------------------------------------------------------------------------------------------------------------------------------------|-------|

|                |                                                                                                                                                                                                                                                                                                                                                                                                                                                                                                                                                                                                                                                                                                                                                                                                                                                                                            |                |                         |
|----------------|--------------------------------------------------------------------------------------------------------------------------------------------------------------------------------------------------------------------------------------------------------------------------------------------------------------------------------------------------------------------------------------------------------------------------------------------------------------------------------------------------------------------------------------------------------------------------------------------------------------------------------------------------------------------------------------------------------------------------------------------------------------------------------------------------------------------------------------------------------------------------------------------|----------------|-------------------------|
| MatureLinear # | 226.6<br>234.7 • 226.7<br>235 • C<br>236 • D<br>237 • K<br>238 • T<br>239 • H<br>240 • T<br>241 • C<br>242 • P<br>243 • C<br>244 • P<br>245 • P<br>246 • C<br>247 • P<br>248 • P<br>249 • E<br>250 • L<br>251 • L<br>252 • G<br>253 • L<br>254 • L<br>255 • V<br>256 • D<br>257 • G<br>258 • V<br>259 • F<br>260 • V<br>261 • V<br>262 • H<br>263 • N<br>264 • A<br>265 • K<br>266 • A<br>267 • K<br>268 • T<br>269 • A<br>270 • K<br>271 • T<br>272 • I<br>273 • S<br>274 • E<br>275 • R<br>276 • T<br>277 • P<br>278 • E<br>279 • F<br>280 • V<br>281 • D<br>282 • V<br>283 • W<br>284 • S<br>285 • H<br>286 • E<br>287 • D<br>288 • P<br>289 • E<br>290 • V<br>291 • K<br>292 • K<br>293 • V<br>294 • S<br>295 • R<br>296 • V<br>297 • R<br>298 • Y<br>299 • R<br>300 • N<br>301 • S<br>302 • T<br>303 • Y<br>304 • R<br>305 • V<br>306 • V<br>307 • S<br>308 • V<br>309 • S<br>310 • S | MatureLinear # | 3BNC117_HC<br>PGT121_HC |
|----------------|--------------------------------------------------------------------------------------------------------------------------------------------------------------------------------------------------------------------------------------------------------------------------------------------------------------------------------------------------------------------------------------------------------------------------------------------------------------------------------------------------------------------------------------------------------------------------------------------------------------------------------------------------------------------------------------------------------------------------------------------------------------------------------------------------------------------------------------------------------------------------------------------|----------------|-------------------------|

|       |                                                                                                                                                                                                                                                                                                                                                                                                                                                                                                                  |       |
|-------|------------------------------------------------------------------------------------------------------------------------------------------------------------------------------------------------------------------------------------------------------------------------------------------------------------------------------------------------------------------------------------------------------------------------------------------------------------------------------------------------------------------|-------|
| ASN # | Fc-N32<br>Fc-N33<br>Fc-N34<br>Fc-N35<br>Fc-N36<br>Fc-N37<br>Fc-N38<br>Fc-N39<br>Fc-N40<br>Fc-N41<br>Fc-N42<br>Fc-N43<br>Fc-N44<br>Fc-N45<br>Fc-N46<br>Fc-N47<br>Fc-N48<br>Fc-N49<br>Fc-N50<br>Fc-N51<br>Fc-N52<br>Fc-N53<br>Fc-N54<br>Fc-N55<br>Fc-N56<br>Fc-N57<br>Fc-N58<br>Fc-N59<br>Fc-N60<br>Fc-N61<br>Fc-N62<br>Fc-N63<br>Fc-N64<br>Fc-N65<br>Fc-N66<br>Fc-N67<br>Fc-N68<br>Fc-N69<br>Fc-N70<br>Fc-N71<br>Fc-N72<br>Fc-N73<br>Fc-N74<br>Fc-N75<br>Fc-N76<br>Fc-N77<br>Fc-N78<br>Fc-N79<br>Fc-N80<br>Fc-N81 | ASN # |
|-------|------------------------------------------------------------------------------------------------------------------------------------------------------------------------------------------------------------------------------------------------------------------------------------------------------------------------------------------------------------------------------------------------------------------------------------------------------------------------------------------------------------------|-------|

|                |                                                                                                                                                                                                                                                                                                                                                                                                                                                                                                                                                                                                                                                                                                                                                                                                                                                                                                                                                                                                                                                                                                                                                                                                                                                                                     |                |                         |
|----------------|-------------------------------------------------------------------------------------------------------------------------------------------------------------------------------------------------------------------------------------------------------------------------------------------------------------------------------------------------------------------------------------------------------------------------------------------------------------------------------------------------------------------------------------------------------------------------------------------------------------------------------------------------------------------------------------------------------------------------------------------------------------------------------------------------------------------------------------------------------------------------------------------------------------------------------------------------------------------------------------------------------------------------------------------------------------------------------------------------------------------------------------------------------------------------------------------------------------------------------------------------------------------------------------|----------------|-------------------------|
| MatureLinear # | 268<br>278<br>279<br>280<br>281<br>282<br>283<br>284<br>285<br>286<br>287<br>288<br>289<br>290<br>291<br>292<br>293<br>294<br>295<br>296<br>297<br>298<br>299<br>300<br>301<br>302<br>303<br>304<br>305<br>306<br>307<br>308<br>309<br>310<br>311<br>312<br>313<br>314<br>315<br>316<br>317<br>318<br>319<br>320<br>321<br>322<br>323<br>324<br>325<br>326<br>327<br>328<br>329<br>330<br>331<br>332<br>333<br>334<br>335<br>336<br>337<br>338<br>339<br>340<br>341<br>342<br>343<br>344<br>345<br>346<br>347<br>348<br>349<br>350<br>351<br>352<br>353<br>354<br>355<br>356<br>357<br>358<br>359<br>360<br>361<br>362<br>363<br>364<br>365<br>366<br>367<br>368<br>369<br>370<br>371<br>372<br>373<br>374<br>375<br>376<br>377<br>378<br>379<br>380<br>381<br>382<br>383<br>384<br>385<br>386<br>387<br>388<br>389<br>390<br>391<br>392<br>393<br>394<br>395<br>396<br>397<br>398<br>399<br>400<br>401<br>402<br>403<br>404<br>405<br>406<br>407<br>408<br>409<br>410<br>411<br>412<br>413<br>414<br>415<br>416<br>417<br>418<br>419<br>420<br>421<br>422<br>423<br>424<br>425<br>426<br>427<br>428<br>429<br>430<br>431<br>432<br>433<br>434<br>435<br>436<br>437<br>438<br>439<br>440<br>441<br>442<br>443<br>444<br>445<br>446<br>447<br>448<br>449<br>450<br>451<br>452<br>453 | MatureLinear # | 3BNC117_HC<br>PGT121_HC |
|----------------|-------------------------------------------------------------------------------------------------------------------------------------------------------------------------------------------------------------------------------------------------------------------------------------------------------------------------------------------------------------------------------------------------------------------------------------------------------------------------------------------------------------------------------------------------------------------------------------------------------------------------------------------------------------------------------------------------------------------------------------------------------------------------------------------------------------------------------------------------------------------------------------------------------------------------------------------------------------------------------------------------------------------------------------------------------------------------------------------------------------------------------------------------------------------------------------------------------------------------------------------------------------------------------------|----------------|-------------------------|

|       |                                                                                                                                                                                                                                                                                                                                                                                                                                                                                                                                                  |       |
|-------|--------------------------------------------------------------------------------------------------------------------------------------------------------------------------------------------------------------------------------------------------------------------------------------------------------------------------------------------------------------------------------------------------------------------------------------------------------------------------------------------------------------------------------------------------|-------|
| ASN # | Fc-N82<br>Fc-N83<br>Fc-N84<br>Fc-N85<br>Fc-N86<br>Fc-N87<br>Fc-N88<br>Fc-N89<br>Fc-N90<br>Fc-N91<br>Fc-N92<br>Fc-N93<br>Fc-N94<br>Fc-N95<br>Fc-N96<br>Fc-N97<br>Fc-N98<br>Fc-N99<br>Fc-N100<br>Fc-N101<br>Fc-N102<br>Fc-N103<br>Fc-N104<br>Fc-N105<br>Fc-N106<br>Fc-N107<br>Fc-N108<br>Fc-N109<br>Fc-N110<br>Fc-N111<br>Fc-N112<br>Fc-N113<br>Fc-N114<br>Fc-N115<br>Fc-N116<br>Fc-N117<br>Fc-N118<br>Fc-N119<br>Fc-N120<br>Fc-N121<br>Fc-N122<br>Fc-N123<br>Fc-N124<br>Fc-N125<br>Fc-N126<br>Fc-N127<br>Fc-N128<br>Fc-N129<br>Fc-N130<br>Fc-N131 | ASN # |
|-------|--------------------------------------------------------------------------------------------------------------------------------------------------------------------------------------------------------------------------------------------------------------------------------------------------------------------------------------------------------------------------------------------------------------------------------------------------------------------------------------------------------------------------------------------------|-------|

|                |                                                                                                                                                                                                                                                                                                                                                                                                                                                                                                                                                                                                                                                                                                                                                                                                                                                                                                                                                                                                                                       |                |                         |
|----------------|---------------------------------------------------------------------------------------------------------------------------------------------------------------------------------------------------------------------------------------------------------------------------------------------------------------------------------------------------------------------------------------------------------------------------------------------------------------------------------------------------------------------------------------------------------------------------------------------------------------------------------------------------------------------------------------------------------------------------------------------------------------------------------------------------------------------------------------------------------------------------------------------------------------------------------------------------------------------------------------------------------------------------------------|----------------|-------------------------|
| MatureLinear # | 311<br>312<br>313<br>314<br>315<br>316<br>317<br>318<br>319<br>320<br>321<br>322<br>323<br>324<br>325<br>326<br>327<br>328<br>329<br>330<br>331<br>332<br>333<br>334<br>335<br>336<br>337<br>338<br>339<br>340<br>341<br>342<br>343<br>344<br>345<br>346<br>347<br>348<br>349<br>350<br>351<br>352<br>353<br>354<br>355<br>356<br>357<br>358<br>359<br>360<br>361<br>362<br>363<br>364<br>365<br>366<br>367<br>368<br>369<br>370<br>371<br>372<br>373<br>374<br>375<br>376<br>377<br>378<br>379<br>380<br>381<br>382<br>383<br>384<br>385<br>386<br>387<br>388<br>389<br>390<br>391<br>392<br>393<br>394<br>395<br>396<br>397<br>398<br>399<br>400<br>401<br>402<br>403<br>404<br>405<br>406<br>407<br>408<br>409<br>410<br>411<br>412<br>413<br>414<br>415<br>416<br>417<br>418<br>419<br>420<br>421<br>422<br>423<br>424<br>425<br>426<br>427<br>428<br>429<br>430<br>431<br>432<br>433<br>434<br>435<br>436<br>437<br>438<br>439<br>440<br>441<br>442<br>443<br>444<br>445<br>446<br>447<br>448<br>449<br>450<br>451<br>452<br>453 | MatureLinear # | 3BNC117_HC<br>PGT121_HC |
|----------------|---------------------------------------------------------------------------------------------------------------------------------------------------------------------------------------------------------------------------------------------------------------------------------------------------------------------------------------------------------------------------------------------------------------------------------------------------------------------------------------------------------------------------------------------------------------------------------------------------------------------------------------------------------------------------------------------------------------------------------------------------------------------------------------------------------------------------------------------------------------------------------------------------------------------------------------------------------------------------------------------------------------------------------------|----------------|-------------------------|

|       |                                                                                                                                                                                                                                                                                                                                                                                                                                                                                                                 |       |
|-------|-----------------------------------------------------------------------------------------------------------------------------------------------------------------------------------------------------------------------------------------------------------------------------------------------------------------------------------------------------------------------------------------------------------------------------------------------------------------------------------------------------------------|-------|
| ASN # | Fc-C9<br>Fc-C10<br>Fc-C11<br>Fc-C12<br>Fc-C13<br>Fc-C14<br>Fc-C15<br>Fc-C16<br>Fc-C17<br>Fc-C18<br>Fc-C19<br>Fc-C20<br>Fc-C21<br>Fc-C22<br>Fc-C23<br>Fc-C24<br>Fc-C25<br>Fc-C26<br>Fc-C27<br>Fc-C28<br>Fc-C29<br>Fc-C30<br>Fc-C31<br>Fc-C32<br>Fc-C33<br>Fc-C34<br>Fc-C35<br>Fc-C36<br>Fc-C37<br>Fc-C38<br>Fc-C39<br>Fc-C40<br>Fc-C41<br>Fc-C42<br>Fc-C43<br>Fc-C44<br>Fc-C45<br>Fc-C46<br>Fc-C47<br>Fc-C48<br>Fc-C49<br>Fc-C50<br>Fc-C51<br>Fc-C52<br>Fc-C53<br>Fc-C54<br>Fc-C55<br>Fc-C56<br>Fc-C57<br>Fc-C58 | ASN # |
|-------|-----------------------------------------------------------------------------------------------------------------------------------------------------------------------------------------------------------------------------------------------------------------------------------------------------------------------------------------------------------------------------------------------------------------------------------------------------------------------------------------------------------------|-------|

|                |                                                                                                                                                                                                                                                                                                                                                                                                                                                                                                                                                                                                                                                                                                                   |                |                         |
|----------------|-------------------------------------------------------------------------------------------------------------------------------------------------------------------------------------------------------------------------------------------------------------------------------------------------------------------------------------------------------------------------------------------------------------------------------------------------------------------------------------------------------------------------------------------------------------------------------------------------------------------------------------------------------------------------------------------------------------------|----------------|-------------------------|
| MatureLinear # | 355<br>356<br>357<br>358<br>359<br>360<br>361<br>362<br>363<br>364<br>365<br>366<br>367<br>368<br>369<br>370<br>371<br>372<br>373<br>374<br>375<br>376<br>377<br>378<br>379<br>380<br>381<br>382<br>383<br>384<br>385<br>386<br>387<br>388<br>389<br>390<br>391<br>392<br>393<br>394<br>395<br>396<br>397<br>398<br>399<br>400<br>401<br>402<br>403<br>404<br>405<br>406<br>407<br>408<br>409<br>410<br>411<br>412<br>413<br>414<br>415<br>416<br>417<br>418<br>419<br>420<br>421<br>422<br>423<br>424<br>425<br>426<br>427<br>428<br>429<br>430<br>431<br>432<br>433<br>434<br>435<br>436<br>437<br>438<br>439<br>440<br>441<br>442<br>443<br>444<br>445<br>446<br>447<br>448<br>449<br>450<br>451<br>452<br>453 | MatureLinear # | 3BNC117_HC<br>PGT121_HC |
|----------------|-------------------------------------------------------------------------------------------------------------------------------------------------------------------------------------------------------------------------------------------------------------------------------------------------------------------------------------------------------------------------------------------------------------------------------------------------------------------------------------------------------------------------------------------------------------------------------------------------------------------------------------------------------------------------------------------------------------------|----------------|-------------------------|

|       |                                                                                                                                                                                                                                                                                                                                                                                                                                                                                                                           |       |
|-------|---------------------------------------------------------------------------------------------------------------------------------------------------------------------------------------------------------------------------------------------------------------------------------------------------------------------------------------------------------------------------------------------------------------------------------------------------------------------------------------------------------------------------|-------|
| ASN # | Fc-C59<br>Fc-C60<br>Fc-C61<br>Fc-C62<br>Fc-C63<br>Fc-C64<br>Fc-C65<br>Fc-C66<br>Fc-C67<br>Fc-C68<br>Fc-C69<br>Fc-C70<br>Fc-C71<br>Fc-C72<br>Fc-C73<br>Fc-C74<br>Fc-C75<br>Fc-C76<br>Fc-C77<br>Fc-C78<br>Fc-C79<br>Fc-C80<br>Fc-C81<br>Fc-C82<br>Fc-C83<br>Fc-C84<br>Fc-C85<br>Fc-C86<br>Fc-C87<br>Fc-C88<br>Fc-C89<br>Fc-C90<br>Fc-C91<br>Fc-C92<br>Fc-C93<br>Fc-C94<br>Fc-C95<br>Fc-C96<br>Fc-C97<br>Fc-C98<br>Fc-C99<br>Fc-C100<br>Fc-C101<br>Fc-C102<br>Fc-C103<br>Fc-C104<br>Fc-C105<br>Fc-C106<br>Fc-C107<br>Fc-C108 | ASN # |
|-------|---------------------------------------------------------------------------------------------------------------------------------------------------------------------------------------------------------------------------------------------------------------------------------------------------------------------------------------------------------------------------------------------------------------------------------------------------------------------------------------------------------------------------|-------|

|                |                                                                                                                                                                                                                                                                                                                                                                                                                    |                |                         |
|----------------|--------------------------------------------------------------------------------------------------------------------------------------------------------------------------------------------------------------------------------------------------------------------------------------------------------------------------------------------------------------------------------------------------------------------|----------------|-------------------------|
| MatureLinear # | 396<br>397<br>398<br>399<br>400<br>401<br>402<br>403<br>404<br>405<br>406<br>407<br>408<br>409<br>410<br>411<br>412<br>413<br>414<br>415<br>416<br>417<br>418<br>419<br>420<br>421<br>422<br>423<br>424<br>425<br>426<br>427<br>428<br>429<br>430<br>431<br>432<br>433<br>434<br>435<br>436<br>437<br>438<br>439<br>440<br>441<br>442<br>443<br>444<br>445<br>446<br>447<br>448<br>449<br>450<br>451<br>452<br>453 | MatureLinear # | 3BNC117_HC<br>PGT121_HC |
|----------------|--------------------------------------------------------------------------------------------------------------------------------------------------------------------------------------------------------------------------------------------------------------------------------------------------------------------------------------------------------------------------------------------------------------------|----------------|-------------------------|

|       |                                                                                                                                                                                                             |       |
|-------|-------------------------------------------------------------------------------------------------------------------------------------------------------------------------------------------------------------|-------|
| ASN # | Fc-C109<br>Fc-C110<br>Fc-C111<br>Fc-C112<br>Fc-C113<br>Fc-C114<br>Fc-C115<br>Fc-C116<br>Fc-C117<br>Fc-C118<br>Fc-C119<br>Fc-C120<br>Fc-C121<br>Fc-C122<br>Fc-C123<br>HonestPoi1<br>HonestPoi2<br>HonestPoi3 | ASN # |
|-------|-------------------------------------------------------------------------------------------------------------------------------------------------------------------------------------------------------------|-------|

|                |                                                                                                       |                |                         |
|----------------|-------------------------------------------------------------------------------------------------------|----------------|-------------------------|
| MatureLinear # | 439<br>440<br>441<br>442<br>443<br>444<br>445<br>446<br>447<br>448<br>449<br>450<br>451<br>452<br>453 | MatureLinear # | 3BNC117_HC<br>PGT121_HC |
|----------------|-------------------------------------------------------------------------------------------------------|----------------|-------------------------|

|       |                                                                                                  |                |                         |
|-------|--------------------------------------------------------------------------------------------------|----------------|-------------------------|
| ASN # | H<br>H<br>N<br>H<br>Y<br>T<br>D<br>K<br>S<br>L<br>S<br>L<br>S<br>L<br>S<br>L<br>S<br>P<br>G<br>K | MatureLinear # | 3BNC117_HC<br>PGT121_HC |
|-------|--------------------------------------------------------------------------------------------------|----------------|-------------------------|

|                |                                        |                |                         |
|----------------|----------------------------------------|----------------|-------------------------|
| MatureLinear # | 448<br>449<br>450<br>451<br>452<br>453 | MatureLinear # | 3BNC117_HC<br>PGT121_HC |
|----------------|----------------------------------------|----------------|-------------------------|

|       |                                                                                        |                |                         |
|-------|----------------------------------------------------------------------------------------|----------------|-------------------------|
| ASN # | H<br>H<br>N<br>H<br>Y<br>T<br>D<br>K<br>S<br>L<br>S<br>L<br>S<br>L<br>S<br>P<br>G<br>K | MatureLinear # | 3BNC117_HC<br>PGT121_HC |
|-------|----------------------------------------------------------------------------------------|----------------|-------------------------|

|                |                                        |                |                         |
|----------------|----------------------------------------|----------------|-------------------------|
| MatureLinear # | 448<br>449<br>450<br>451<br>452<br>453 | MatureLinear # | 3BNC117_HC<br>PGT121_HC |
|----------------|----------------------------------------|----------------|-------------------------|

|       |                                                                                        |                |                         |
|-------|----------------------------------------------------------------------------------------|----------------|-------------------------|
| ASN # | H<br>H<br>N<br>H<br>Y<br>T<br>D<br>K<br>S<br>L<br>S<br>L<br>S<br>L<br>S<br>P<br>G<br>K | MatureLinear # | 3BNC117_HC<br>PGT121_HC |
|-------|----------------------------------------------------------------------------------------|----------------|-------------------------|
